# Supplementary material for: Prebiotics in infant nutrition: a critical appraisal
Source: Preprints.org preprint supplement (doi:10.20944/preprints201809.0597.v1), 2018-09-30
Supplement: Supplementary file 8 [file supplementary Table 1.docx]

| 1 | Turk J Pediatr. 2017; 59(1):13-19.  The effect of early administration of combined multi-strain and multi-species probiotics on gastrointestinal morbidities and mortality in preterm infants: A randomized controlled trial in a tertiary care unit.  Güney-Varal İ, Köksal N, Özkan H, Bağcı O, Doğan P. | Discarded as dealing with probiotics |
| --- | --- | --- |
| 2 | Gut. 2017 Nov; 66(11):1956-1967.  Prebiotic galacto-oligosaccharides mitigate the adverse effects of ironfortification on the gut microbiome: a randomised controlled study in Kenyan infants.  Paganini D, Uyoga MA, Kortman GAM, Cercamondi CI, Moretti D, Barth-Jaeggi T, Schwab C, Boekhorst J, Timmerman HM, Lacroix C, Karanja S, Zimmermann MB. | Selected 1 |
| 3 | J Pediatr Gastroenterol Nutr. 2017 Jul; 65(1):102-106.  Effect of Synbiotic on the Gut Microbiota of Cesarean Delivered Infants: A Randomized, Double-blind, Multicenter Study.  Chua MC, Ben-Amor K, Lay C, Neo AGE, Chiang WC, Rao R, Chew C, Chaithongwongwatthana S, Khemapech N, Knol J, Chongsrisawat V. | Discardes as dealing with synbiotic |
| 4 | .J Pediatr Gastroenterol Nutr. 2017 Jun; 64(6):966-970.  Medically Graded Honey Supplementation Formula to Preterm Infants as a Prebiotic: A Randomized Controlled Trial.  Aly H, Said RN, Wali IE, Elwakkad A, Soliman Y, Awad AR, Shawky MA, Alam MSA, Mohamed MA. | Discarded as honey has not a stable, well defined composition |
| 5 | Acta Paediatr. 2017 Jul; 106(7):1150-1158.  Randomised controlled trial demonstrates that fermented infant formula with short-chain galacto-oligosaccharides and long-chain fructo-oligosaccharides reduces the incidence of infantile colic.  Vandenplas Y, Ludwig T, Bouritius H, Alliet P, Forde D, Peeters S, Huet F, Hourihane J. | Selected 2 |
| 6 | Nutrients. 2017 Feb 26; 9(3).  Maternal Prebiotic Ingestion Increased the Number of Fecal Bifidobacteria inPregnant Women but Not in Their Neonates Aged One Month.  Jinno S, Toshimitsu T, Nakamura Y, Kubota T, Igoshi Y, Ozawa N, Suzuki S, Nakano T, Morita Y, Arima T, Yamaide F, Kohno Y, Masuda K, Shimojo N. | Discarded as treated subjects were the mothers |
| 7 | Pediatr Res. 2017 May; 81(5):752-758.  Effects of infant formula supplemented with prebiotics compared with synbiotics on growth up to the age of 12 mo: a randomized controlled trial.  Szajewska H, Ruszczyński M, Szymański H, Sadowska-Krawczenko I, Piwowarczyk A, Rasmussen PB, Kristensen MB, West CE, Hernell O. | Selected 3 |
| 8 | Pediatr Res. 2017 Apr; 81(4):622-631.  Starter formula enriched in prebiotics and probiotics ensures normal growth of infants and promotes gut health: a randomized clinical trial.  Radke M, Picaud JC, Loui A, Cambonie G, Faas D, Lafeber HN, de Groot N, Pecquet SS, Steenhout PG, Hascoet JM. | Discarded as dealing with synbiotics |
| 9 | Turk J Gastroenterol. 2016 Nov; 27(6):537-540.  Effects of zinc or synbiotic on the duration of diarrhea in children with acute infectious diarrhea.  Yazar AS, Güven Ş, Dinleyici EÇ. | Discarded as dealing with synbiotics |
| 10 | Nutrients. 2016 Oct 27; 8(11).  Administration of a Multi-Strain Probiotic Product to Women in the Perinatal Period Differentially Affects the Breast Milk Cytokine Profile and May Have Beneficial Effects on Neonatal Gastrointestinal Functional Symptoms. A Randomized Clinical Trial.  Baldassarre ME, Di Mauro A, Mastromarino P, Fanelli M, MartinelliD, Urbano F, Capobianco D, Laforgia N. | Discarded as dealing with probiotics |
| 11 | J Nutr. 2016 Dec146(12):2559-2566.  Similar to Those Who Are Breastfed, Infants Fed a Formula Containing 2'-Fucosyllactose Have Lower Inflammatory Cytokines in a Randomized Controlled Trial.  Goehring KC, Marriage BJ, Oliver JS, Wilder JA, Barrett EG, Buck RH. | Discarded as containing human oligosaccharides |
| 12 | Br J Nutr. 2016 Oct116(8):1356-1368.  Oral supplementation of healthy adults with 2'-O-fucosyllactose and lacto-N-neotetraose is well tolerated and shifts the intestinal microbiota.  Elison E, Vigsnaes LK, Rindom Krogsgaard L, Rasmussen J, Sørensen N, McConnell B, Hennet T, Sommer MO, Bytzer P. | Discarded as dealing with adults |
| 13 | J Clin Gastroenterol. 2016 Nov/Dec; 50 Suppl 2, Proceedings from the 8th Probiotics, Prebiotics & New Foods for Microbiota and Human Health meeting held in Rome, Italy on September 13-15, 2015:S164-S167.  The Association of Bifidobacterium breve BR03 and B632 is Effective to Prevent Colics in Bottle-fed Infants: A Pilot, Controlled, Randomized, and Double-Blind Study.  [Giglione E](https://www.ncbi.nlm.nih.gov/pubmed/?term=Giglione%20E%5BAuthor%5D&cauthor=true&cauthor_uid=27741166), [Prodam F](https://www.ncbi.nlm.nih.gov/pubmed/?term=Prodam%20F%5BAuthor%5D&cauthor=true&cauthor_uid=27741166), [Bellone S](https://www.ncbi.nlm.nih.gov/pubmed/?term=Bellone%20S%5BAuthor%5D&cauthor=true&cauthor_uid=27741166), [Monticone S](https://www.ncbi.nlm.nih.gov/pubmed/?term=Monticone%20S%5BAuthor%5D&cauthor=true&cauthor_uid=27741166), [Beux S](https://www.ncbi.nlm.nih.gov/pubmed/?term=Beux%20S%5BAuthor%5D&cauthor=true&cauthor_uid=27741166), [Marolda A](https://www.ncbi.nlm.nih.gov/pubmed/?term=Marolda%20A%5BAuthor%5D&cauthor=true&cauthor_uid=27741166), [Pagani A](https://www.ncbi.nlm.nih.gov/pubmed/?term=Pagani%20A%5BAuthor%5D&cauthor=true&cauthor_uid=27741166), [Di Gioia D](https://www.ncbi.nlm.nih.gov/pubmed/?term=Di%20Gioia%20D%5BAuthor%5D&cauthor=true&cauthor_uid=27741166), [Del Piano M](https://www.ncbi.nlm.nih.gov/pubmed/?term=Del%20Piano%20M%5BAuthor%5D&cauthor=true&cauthor_uid=27741166), [Mogna G](https://www.ncbi.nlm.nih.gov/pubmed/?term=Mogna%20G%5BAuthor%5D&cauthor=true&cauthor_uid=27741166), [Bona G](https://www.ncbi.nlm.nih.gov/pubmed/?term=Bona%20G%5BAuthor%5D&cauthor=true&cauthor_uid=27741166). | Discarded as dealing with probiotics |
| 14 | J Clin Gastroenterol. 2016 Nov/Dec; 50 Suppl 2, Proceedings from the 8th Probiotics, Prebiotics & New Foods for Microbiota and Human Health meeting held in Rome, Italy on September 13-15, 2015:S120-S123.  Can Probiotics Reduce Diarrhea and Infant Mortality in Africa?: The Project of a Pilot Study.  Del Piano M, Coggiola F, Pane M, Amoruso A, Nicola S, Mogna L. | Discarded as dealing with probiotics |
| 15 | Am J Clin Nutr. 2016 Oct; 104(4):1083-1092.  Growth of infants consuming whey-predominant term infant formulas with a protein content of 1.8 g/100 kcal: a multicenter pooled analysis of individual participant data.  Alexander DD, Yan J, Bylsma LC, Northington RS, Grathwohl D, Steenhout P, Erdmann P, Spivey-Krobath E, Haschke F. | Out of scope of this review |
| 16 | Pediatr Res. 2016 Dec; 80(6):844-851.  Age-associated effect of kestose on Faecalibacterium prausnitzii and symptoms in the atopic dermatitis infants.  Koga Y, Tokunaga S, Nagano J, Sato F, Konishi K, Tochio T, Murakami Y, Masumoto N, Tezuka JI, Sudo N, Kubo C, Shibata R. | Discarded as out of age range |
| 17 | Allergy. 2016 May; 71(5):701-10.  Prebiotic-supplemented partially hydrolysed cow's milk formula for the prevention of eczema in high-risk infants: a randomized controlled trial.  Boyle RJ, Tang ML, Chiang WC, Chua MC, Ismail I, Nauta A, Hourihane JOB, Smith P, Gold M, Ziegler J, Peake J, Quinn P, Rao R, Brown N, Rijnierse A, Garssen J, Warner JO. | Selected 4 |
| 18 | Nutr J. 2016 Feb 27; 15:19.  Cow's milk-based beverage consumption in 1- to 4-year-olds and allergic manifestations: an RCT.  Pontes MV, Ribeiro TC, Ribeiro H, de Mattos AP, Almeida IR, Leal VM, Cabral GN, Stolz S, Zhuang W, Scalabrin DM. | Discarded as not dealing with prebiotics |
| 19 | J Pediatr Gastroenterol Nutr. 2016 Aug; 63(2):270-6.  Neurodevelopment of Preterm Infants at 24 Months After Neonatal Supplementation of a Prebiotic Mix: A Randomized Trial.  van den Berg JP, Westerbeek EA, Bröring-Starre T, Garssen J, van Elburg RM. | Discarded as out of age range |
| 20 | J. Pediatr. Gastroenterol. Nutr. 2016, 63, e43-53  Partly Fermented Infant Formulae With Specific Oligosaccharides Support Adequate Infant Growth and Are Well-Tolerated.  Huet F, Abrahamse-Berkeveld M, Tims S, Simeoni U, Beley G, Savagner C, Vandenplas Y, Hourihane JO. | Selected 5 |
| 21 | PLoS One. 2015 Nov 16; 10(11):e0142897.  Prebiotics Do Not Influence the Severity of Atopic Dermatitis in Infants: A Randomised Controlled Trial.  Boženský J, Hill M, Zelenka R, Skýba T. | Selected 6 |
| 22 | BMC Pediatr. 2015 Nov 7; 15:173.  Growth and tolerance of formula with lactoferrin in infants through one year of age: double-blind, randomized, controlled trial.  Johnston WH, Ashley C, Yeiser M, Harris CL, Stolz SI, Wampler JL, Wittke A, Cooper TR. | Discarded as  out of scope of this review |
| 23 | Nutrients. 2015 Oct 29; 7(11):8939-51.  Effects of Fructans from Mexican Agave in Newborns Fed with Infant Formula: A Randomized Controlled Trial.  López-Velázquez G, Parra-Ortiz MMora Ide L, García-Torres I, Enríquez-Flores S, Alcántara-Ortigoza MA, Angel AG, Velázquez-Aragón J, Ortiz-Hernández R, Cruz-Rubio JM, Villa-Barragán P, Jiménez-Gutiérrez C, Gutiérrez-Castrellón P. | Selected 7 |
| 24 | J Matern Fetal Neonatal Med. 2016 Sep; 29(18):3009-13.  Prebiotics for the management of hyperbilirubinemia in preterm neonates.  Armanian AM, Barekatain B, Hoseinzadeh M, Salehimehr N. | Selected 8 |
| 25 | Pediatr Res. 2015 Dec; 78(6):670-7.  Human milk oligosaccharides in premature infants: absorption, excretion, and influence on the intestinal microbiota.  Underwood MA, Gaerlan S, De Leoz ML, Dimapasoc L, Kalanetra KM, Lemay DG, German JB, Mills DA, Lebrilla CB. | Discared as dealing with human milk oligosaccharides |
| 26 | J Pediatr Gastroenterol Nutr. 2016 Jan; 62(1):80-6.  Early Gut Colonization With Lactobacilli and Staphylococcus in Infants: The Hygiene Hypothesis Extended.  Salminen S, Endo A, Isolauri E, Scalabrin D. | Discarede as not dealing with prebiotics |
| 27 | PLoS One. 2015 Jun 15; 10(6):e0129927.  Similar Occurrence of Febrile Episodes Reported in Non-Atopic Children at Three to Five Years of Age after Prebiotics Supplemented Infant Formula.  Van Stuijvenberg M, Stam J, Grüber C, Mosca F, Arslanoglu S, Chirico G, Braegger CP, Riedler J, Boehm G, Sauer PJ; Multicentre Immuno Programming Study (MIPS) Study Group. | Discarded as out of age  range |
| 28 | Pediatr Allergy Immunol. 2015 Jun; 26(4):316-22.  Synbiotics-supplemented amino acid-based formula supports adequate growth in cow's milk allergic infants.  Burks AW, Harthoorn LF, Van Ampting MT, Oude Nijhuis MM, Langford JE, Wopereis H, Goldberg SB, Ong PY, Essink BJ, Scott RB, Harvey BM. | Discarded as dealing with synbiotics |
| 29 | J Pediatr. 2015 Mar; 166(3):545-51.e1.  The propre-save study: effects of probiotics and prebiotics alone or combined on necrotizing enterocolitis in very low birth weight infants.  Dilli D, Aydin B, Fettah ND, Özyazıcı E, Beken S, Zenciroğlu A, Okumuş N, Özyurt BM, İpek MŞ, Akdağ A, Turan Ö, Bozdağ Ş. | Selected 9 |
| 30 | Nutr J. 2014 Nov 5; 13:105.  Stool fatty acid soaps, stool consistency and gastrointestinal tolerance in term infants fed infant formulas containing high sn-2 palmitate with or without oligofructose: a double-blind, randomized clinical trial.  Nowacki J, Lee HC, Lien R, Cheng SW, Li ST, Yao M, Northington R, Jan I, Mutungi G. | Selected 10 |
| 31 | J Am Coll Nutr. 2014; 33(5):385-93.  Prebiotic effect of an infant formula supplemented with galacto-oligosaccharides: randomized multicenter trial.  Giovannini M, Verduci E, Gregori D, Ballali S, Soldi S, Ghisleni D, Riva E; PLAGOS Trial Study Group. | Selected 11 |
| 32 | Clin Pediatr (Phila). 2015 Apr; 54(4):359-70.  Effect of an α-lactalbumin-enriched infant formula supplemented with oligofructose on fecal microbiota, stool characteristics, and hydration status: a randomized, double-blind, controlled trial.  [Wernimont S](https://www.ncbi.nlm.nih.gov/pubmed/?term=Wernimont%20S%5BAuthor%5D&cauthor=true&cauthor_uid=25297064), [Northington R](https://www.ncbi.nlm.nih.gov/pubmed/?term=Northington%20R%5BAuthor%5D&cauthor=true&cauthor_uid=25297064), [Kullen MJ](https://www.ncbi.nlm.nih.gov/pubmed/?term=Kullen%20MJ%5BAuthor%5D&cauthor=true&cauthor_uid=25297064), [Yao M](https://www.ncbi.nlm.nih.gov/pubmed/?term=Yao%20M%5BAuthor%5D&cauthor=true&cauthor_uid=25297064), [Bettler J](https://www.ncbi.nlm.nih.gov/pubmed/?term=Bettler%20J%5BAuthor%5D&cauthor=true&cauthor_uid=25297064). | Discarded for the presence of an non prebiotic supplementation  (α-lactalbumin) |
| 33 | World J Gastroenterol. 2014 Sep 14; 20(34):12301-7.  Resolution of acute gastroenteritis symptoms in children and adults treated with a novel polyphenol-based prebiotic.  [Noguera T](https://www.ncbi.nlm.nih.gov/pubmed/?term=Noguera%20T%5BAuthor%5D&cauthor=true&cauthor_uid=25232265), [Wotring R](https://www.ncbi.nlm.nih.gov/pubmed/?term=Wotring%20R%5BAuthor%5D&cauthor=true&cauthor_uid=25232265), [Melville CR](https://www.ncbi.nlm.nih.gov/pubmed/?term=Melville%20CR%5BAuthor%5D&cauthor=true&cauthor_uid=25232265), [Hargraves K](https://www.ncbi.nlm.nih.gov/pubmed/?term=Hargraves%20K%5BAuthor%5D&cauthor=true&cauthor_uid=25232265), [Kumm J](https://www.ncbi.nlm.nih.gov/pubmed/?term=Kumm%20J%5BAuthor%5D&cauthor=true&cauthor_uid=25232265), [Morton JM](https://www.ncbi.nlm.nih.gov/pubmed/?term=Morton%20JM%5BAuthor%5D&cauthor=true&cauthor_uid=25232265). | Discarded as out of age range |
| 34 | J Pediatr Gastroenterol Nutr. 2014 Nov; 59(5):653-8.  Tolerance of formulas containing prebiotics in healthy, term infants.  Williams T, Choe Y, Price P, Katz G, Suarez F, Paule C, Mackey A. | Selected 12 |
| 35 | Rev Invest Clin. 2013 Nov-Dec; 65(6):483-90.  Safety of a dual potential prebiotic system from Mexican agave "Metlin® and Metlos®", incorporated to an infant formula for term newborn babies: a randomized controlled trial.  [López-Velázquez G](https://www.ncbi.nlm.nih.gov/pubmed/?term=L%C3%B3pez-Vel%C3%A1zquez%20G%5BAuthor%5D&cauthor=true&cauthor_uid=24687355), [Díaz-García L](https://www.ncbi.nlm.nih.gov/pubmed/?term=D%C3%ADaz-Garc%C3%ADa%20L%5BAuthor%5D&cauthor=true&cauthor_uid=24687355), [Anzo A](https://www.ncbi.nlm.nih.gov/pubmed/?term=Anzo%20A%5BAuthor%5D&cauthor=true&cauthor_uid=24687355), [Parra-Ortiz M](https://www.ncbi.nlm.nih.gov/pubmed/?term=Parra-Ortiz%20M%5BAuthor%5D&cauthor=true&cauthor_uid=24687355), [Llamosas-Gallardo B](https://www.ncbi.nlm.nih.gov/pubmed/?term=Llamosas-Gallardo%20B%5BAuthor%5D&cauthor=true&cauthor_uid=24687355), [Ortiz-Hernández AA](https://www.ncbi.nlm.nih.gov/pubmed/?term=Ortiz-Hern%C3%A1ndez%20AA%5BAuthor%5D&cauthor=true&cauthor_uid=24687355), [Mancilla-Ramírez J](https://www.ncbi.nlm.nih.gov/pubmed/?term=Mancilla-Ram%C3%ADrez%20J%5BAuthor%5D&cauthor=true&cauthor_uid=24687355), [Cruz-Rubio JM](https://www.ncbi.nlm.nih.gov/pubmed/?term=Cruz-Rubio%20JM%5BAuthor%5D&cauthor=true&cauthor_uid=24687355), [Gutiérrez-Castrellón P](https://www.ncbi.nlm.nih.gov/pubmed/?term=Guti%C3%A9rrez-Castrell%C3%B3n%20P%5BAuthor%5D&cauthor=true&cauthor_uid=24687355). | Selected 13 |
| 36 | Eur J Nutr. 2015 Feb; 54(1):89-99.  Prebiotic effect during the first year of life in healthy infants fed formula containing GOS as the only prebiotic: a multicentre, randomised, double-blind and placebo-controlled trial.  Sierra C, Bernal MJ, Blasco J, Martínez R, Dalmau J, Ortuño I, Espín B,Vasallo MI, Gil D, Vidal ML, Infante D, Leis R, Maldonado J, Moreno JM, Román E. | Selected 14 |
| 37 | J Pediatr Gastroenterol Nutr. 2014 Apr; 58(4):428-37.  Effects of growing-up milk supplemented with prebiotics and LCPUFAs on infections in young children.  Chatchatee P, Lee WS, Carrilho E, Kosuwon P, Simakachorn N, Yavuz Y, Schouten B, Graaff PL, Szajewska H. | Discarded for the presence of LCPUFA |
| 38 | Glycobiology. 2014 Feb; 24(2):185-94.  13C-labeled oligosaccharides in breastfed infants' urine: individual-, structure-and time-dependent differences in the excretion.  Dotz V, Rudloff S, Blank D, Lochnit G, Geyer R, Kunz C. | Discaded as out of scope of this review |
| 39 | JPEN J Parenter Enteral Nutr. 2015 Mar; 39(3):359-68.  Motilin and gastrin secretion and lipid profile in preterm neonates followingprebiotics supplementation: a double-blind randomized controlled study.  Dasopoulou M, Briana DD, Boutsikou T, Karakasidou E, Roma E, Costalos C, Malamitsi-Puchner A. | Selected 15 |
| 40 | J Pediatr Gastroenterol Nutr. 2014 Mar; 58(3):352-60.  Prebiotic oligosaccharides in premature infants.  Underwood MA, Kalanetra KM, Bokulich NA, Mirmiran M, Barile D, Tancredi DJ, German JB, Lebrilla CB, Mills DA. | Selected 16 |
| 41 | J Allergy Clin Immunol. 2014 Feb; 133(2):405-13.  Prebiotic and probiotic supplementation prevents rhinovirus infections in preterm infants: a randomized, placebo-controlled trial.  Luoto R, Ruuskanen O, Waris M, Kalliomäki M, Salminen S, Isolauri E. | Selected 17 |
| 42 | PLoS One. 2013 Aug 8; 8(8):e70904.  Neutral and acidic oligosaccharides supplementation does not increase the vaccine antibody response in preterm infants in a randomized clinical trial.  Van den Berg JP, Westerbeek EA, van der Klis FR, Berbers GA, Lafeber HN, van Elburg RM. | Selected 18 |
| 43 | J Pediatr. 2013 Nov; 163(5):1272-7.e1-2.  Effects of early prebiotic and probiotic supplementation on development of gut microbiota and fussing and crying in preterm infants: a randomized, double-blind, placebo-controlled trial.  Pärtty A, Luoto R, Kalliomäki M, Salminen S, Isolauri E. | Selected 19 |
| 44 | Neuropediatrics. 2014 Feb; 45(1):22-9.  Neurodevelopmental outcome during the first year of life in preterm infants after supplementation of a prebiotic mixture in the neonatal period: a follow-up study.  LeCouffe NE, Westerbeek EA, Van Schie PE, Schaaf VA, Lafeber HN, Van Elburg RM. | Discarded as out of age range |
| 45 | J Pediatr Gastroenterol Nutr. 2013 Aug; 57(2):180-7.  Effect of infant and follow-on formulas containing B lactis and galacto- and fructo-oligosaccharides on infection in healthy term infants.  Bocquet A, Lachambre E, Kempf C, Beck L. | Discarded as dealing with synbiotic |
| 46 | J Hum Lact. 2013 Nov; 29(4):591-6.  Effects of synbiotic supplementation on breast milk levels of IgA, TGF-β1, and TGF-β2.  Nikniaz L, Ostadrahimi A, Mahdavi R, Hejazi MA, Salekdeh GH. | Discarded as dealing with synbiotic |
| 47 | Clin Nutr. 2013 Dec; 32(6):918-27.  Safety and efficacy of inulin and oligofructose supplementation in infant  formula: results from a randomized clinical trial.  Closa-Monasterolo R, Gispert-Llaurado M, Luque V, Ferre N, Rubio-Torrents C, Zaragoza-Jordana M, Escribano J. | Selected 20 |
| 48 | J Biol Regul Homeost Agents. 2012 Jul-Sep; 26(3 Suppl):49-59.  Early neutral prebiotic oligosaccharide supplementation reduces the incidence of some allergic manifestations in the first 5 years of life.  Arslanoglu S, Moro GE, Boehm G, Wienz F, Stahl B, Bertino E. | Discardes as out of age range |
| 49 | Pediatr Infect Dis J. 2013 Aug; 32(8):810-4.  Probiotics and prebiotics in preventing episodes of acute otitis media in high-risk children: a randomized, double-blind, placebo-controlled study.  Cohen R, Martin E, de La Rocque F, Thollot F, Pecquet S, Werner A, BoucheratM, Varon E, Bingen E, Levy C. | Discarded for the use of probiotics and out of age range |
| 50 | Breastfeed Med. 2013 Apr; 8:217-22.  Effects of synbiotic supplementation on total antioxidant capacity of human breastmilk.  Nikniaz L, Mahdavi R, Ostadrahimi A, Hejazi MA, Vatankhah AM. | Discarded as dealing with synbiotics |
| 51 | Eur J Pediatr. 2013 Mar; 172(3):317-23.  Effect of non-human neutral and acidic oligosaccharides on allergic and  infectious diseases in preterm infants.  Niele N, van Zwol A, Westerbeek EA, Lafeber HN, van Elburg RM. | Selected 21 |
| 52 | Eur J Clin Microbiol Infect Dis. 2013 Feb; 32(2):269-76.  The effect of enteral supplementation of specific neutral and acidic oligosaccharides on the faecal microbiota and intestinal microenvironment in preterm infants.  Westerbeek EA, Slump RA, Lafeber HN, Knol J, Georgi G, Fetter WP, van Elburg RM. | Selected 22 |
| 53 | BMC Pediatr. 2012 Aug 7; 12:118.  Total calcium absorption is similar from infant formulas with and without prebiotics and exceeds that in human milk-fed infants.  Hicks PD, Hawthorne KM, Berseth CL, Marunycz JD, Heubi JE, Abrams SA. | Selected 23 |
| 54 | Benef Microbes. 2012 Sep; 3(3):189-94.  Cost/benefit of synbiotics in acute infectious gastroenteritis: spend to save.  Vandenplas Y, De Hert S; Probiotical study group. | Discarded as dealing with synbiotics |
| 55 | Acta Paediatr. 2012 Sep; 101(9):929-34.  Antibiotic use in infants in the first year of life in five European countries.  Stam J, van Stuijvenberg M, Grüber C, Mosca F, Arslanoglu S, Chirico G,Braegger CP, Riedler J, Boehm G, Sauer PJ; Multicenter Infection Prevention Study. | Discarded as out of scope |
| 56 | Nutr J. 2012 Jun 7; 11:38.  Growth and tolerance of infants fed formula supplemented with polydextrose (PDX) and/or galactooligosaccharides (GOS): double-blind, randomized, controlled trial.  Ashley C, Johnston WH, Harris CL, Stolz SI, Wampler JL, Berseth CL. | Selected 24 |
| 58 | J Pediatr Gastroenterol Nutr. 2012 Sep; 55(3):314-20.  Quantitative analysis of intestinal bacterial populations from term infants fed  formula supplemented with fructo-oligosaccharides.  Xia Q, Williams T, Hustead D, Price P, Morrison M, Yu Z. | Selected 25 |
| 59 | J Pediatr Gastroenterol Nutr. 2012 Jun; 54(6):828-9.  Inulin and fructo-oligosaccharides for the prevention of antibiotic-associated diarrhea in children: report by the ESPGHAN Working Group on Probiotics and Prebiotics.  [Szajewska H](https://www.ncbi.nlm.nih.gov/pubmed/?term=Szajewska%20H%5BAuthor%5D&cauthor=true&cauthor_uid=22343908), [Weizman Z](https://www.ncbi.nlm.nih.gov/pubmed/?term=Weizman%20Z%5BAuthor%5D&cauthor=true&cauthor_uid=22343908), [Abu-Zekry M](https://www.ncbi.nlm.nih.gov/pubmed/?term=Abu-Zekry%20M%5BAuthor%5D&cauthor=true&cauthor_uid=22343908), [Kekez AJ](https://www.ncbi.nlm.nih.gov/pubmed/?term=Kekez%20AJ%5BAuthor%5D&cauthor=true&cauthor_uid=22343908), [Braegger CP](https://www.ncbi.nlm.nih.gov/pubmed/?term=Braegger%20CP%5BAuthor%5D&cauthor=true&cauthor_uid=22343908), [Kolacek S](https://www.ncbi.nlm.nih.gov/pubmed/?term=Kolacek%20S%5BAuthor%5D&cauthor=true&cauthor_uid=22343908), [Micetic-Turk D](https://www.ncbi.nlm.nih.gov/pubmed/?term=Micetic-Turk%20D%5BAuthor%5D&cauthor=true&cauthor_uid=22343908), [Ruszczyński M](https://www.ncbi.nlm.nih.gov/pubmed/?term=Ruszczy%C5%84ski%20M%5BAuthor%5D&cauthor=true&cauthor_uid=22343908), [Vukavic T](https://www.ncbi.nlm.nih.gov/pubmed/?term=Vukavic%20T%5BAuthor%5D&cauthor=true&cauthor_uid=22343908); [ESPGHAN Working Group on Probiotics and Prebiotics](https://www.ncbi.nlm.nih.gov/pubmed/?term=ESPGHAN%20Working%20Group%20on%20Probiotics%20and%20Prebiotics%5BCorporate%20Author%5D). | Discarded as review |
| 60 | JPEN J Parenter Enteral Nutr. 2012 Jan; 36(1 Suppl):95S-105S.  Effects of prebiotic-containing infant formula on gastrointestinal tolerance and fecal microbiota in a randomized controlled trial.  Holscher HD, Faust KL, Czerkies LA, Litov R, Ziegler EE, Lessin H, Hatch T, Sun S, Tappenden KA. | Selected 26 |
| 61 | Pharmacol Res. 2012 Feb; 65(2):231-8.  Lactobacillus fermentum CECT 5716 is safe and well tolerated in infants of 1-6 months of age: a randomized controlled trial.  Gil-Campos M, López MÁ, Rodriguez-Benítez MV, Romero J, Roncero I, Linares MD, Maldonado J, López-Huertas E, Berwind R, Ritzenthaler KL, Navas V, Sierra C, Sempere L, Geerlings A, Maldonado-Lobón JA, Valero AD, Lara-Villoslada F, Olivares M. | Discarded as dealing with probiotics |
| 62 | PLoS One. 2011; 6(11):e28010.  Tolerance and safety evaluation in a large cohort of healthy infants fed an innovative prebiotic formula: a randomized controlled trial.  Piemontese P, Giannì ML, Braegger CP, Chirico G, Grüber C, Riedler J, Arslanoglu S, van Stuijvenberg M, Boehm G, Jelinek J, Roggero P. | Selected 27 |
| 63 | Clin Exp Allergy. 2012 Apr; 42(4):531-9.  No detectable beneficial systemic immunomodulatory effects of a specific synbiotic mixture in infants with atopic dermatitis.  Van der Aa LB, Lutter R, Heymans HS, Smids BS, Dekker T, Van Aalderen WM, Sillevis Smitt JH, Knippels LM, Garssen J, Nauta AJ, Sprikkelman AB. | Discarded as dealing with probiotics |
| 64 | Br J Nutr. 2011 Dec; 106(11):1740-8.  Do prebiotics reduce the number of fever episodes in healthy children in their first year of life: a randomised controlled trial.  Van Stuijvenberg M, Eisses AM, Grüber C, Mosca F, Arslanoglu S, Chirico G,Braegger CP, Riedler J, Boehm G, Sauer PJ. | Selected 28 |
| 65 | J Pediatr Gastroenterol Nutr. 2012 Feb; 54(2):288-90.  Stool pattern changes in toddlers consuming a follow-on formula supplemented with polydextrose and galactooligosaccharides.  Ribeiro TC, Costa-Ribeiro H Jr, Almeida PS, Pontes MV, Leite ME, Filadelfo LR,Khoury JC, Bean JA, Mitmesser SH, Vanderhoof JA, Scalabrin DM. | Discarded as out of age range |
| 66 | Mol Genet Metab. 2011; 104 Suppl:S55-9.  Specific prebiotics in a formula for infants with Phenylketonuria.  MacDonald A, Cochrane B, Wopereis H, Loveridge N. | Selected 29 |
| 67 | J Pediatr Gastroenterol Nutr. 2012 Mar; 54(3):343-52.  New prebiotic blend of polydextrose and galacto-oligosaccharides has a bifidogenic effect in young infants.  Scalabrin DM, Mitmesser SH, Welling GW, Harris CL, Marunycz JD, Walker DC, Bos NA, Tölkkö S, Salminen S, Vanderhoof JA. | Selected 30 |
| 68 | Vaccine. 2011 Oct 13; 29(44):7766-72.  A mixture of three prebiotics does not affect vaccine specific antibody responses in healthy term infants in the first year of life.  Stam J, van Stuijvenberg M, Garssen J, Knipping K, Sauer PJ. | Selected 31 |
| 69 | J Pediatr Gastroenterol Nutr. 2011 Aug; 53(2):174-81.  Tolerance, safety, and effect on the faecal microbiota of an enteral formulasupplemented with pre- and probiotics in critically ill children.  Simakachorn N, Bibiloni R, Yimyaem P, Tongpenyai Y, Varavithaya W, Grathwohl D, Reuteler G, Maire JC, Blum S, Steenhout P, Benyacoub J, Schiffrin EJ. | Discarded as dealing with critically ill subjects |
| 70 | Clin Exp Allergy. 2011 Oct; 41(10):1414-21.  Ovalbumin-specific immunoglobulins A and G levels at age 2 years are associated with the occurrence of atopic disorders.  Kukkonen AK, Savilahti EM, Haahtela T, Savilahti E, Kuitunen M. | Discarded as out of scope of this review |
| 71 | Pediatr Allergy Immunol. 2011 Aug; 22(5):537-42.  Non-digestible oligosaccharides reduce immunoglobulin free light-chain concentrations in infants at risk for allergy.  Schouten B, Van Esch BC, Kormelink TG, Moro GE, Arslanoglu S, Boehm G,Knippels LM, Redegeld FA, Willemsen LE, Garssen J. | Selected 32 |
| 72 | J Nutr. 2011 Jul; 141(7):1335-9.  A specific prebiotic mixture added to starting infant formula has long-lasting bifidogenic effects.  Salvini F, Riva E, Salvatici E, Boehm G, Jelinek J, Banderali G, Giovannini M. | Selected 33 |
| 73 | J Pediatr Gastroenterol Nutr. 2011 Jun; 52(6):763-71.  Physiological and bifidogenic effects of prebiotic supplements in infant formulae.  Veereman-Wauters G, Staelens S, Van de Broek H, Plaskie K, Wesling F, Roger LC, McCartney AL, Assam P. | Selected 34 |
| 74 | Acta Paediatr. 2011 Nov; 100(11):1426-31.  The effect of neutral and acidic oligosaccharides on stool viscosity, stool frequency and stool pH in preterm infants.  Westerbeek EA, Hensgens RL, Mihatsch WA, Boehm G, Lafeber HN, van Elburg RM. | Selected 35 |
| 75 | Br J Nutr. 2011 Jun 28; 105(12):1843-51.  A fermented formula in pre-term infants: clinical tolerance, gut microbiota,down-regulation of faecal calprotectin and up-regulation of faecal secretory IgA.  Campeotto F, Suau A, Kapel N, Magne F, Viallon V, Ferraris L, Waligora-Dupriet AJ, Soulaines P, Leroux B, Kalach N, Dupont C, Butel MJ. | Discarded as out of scope of this review |
| 76 | Asia Pac J Clin Nutr. 2011; 20(1):69-76.  Improved growth of toddlers fed a milk containing synbiotics.  Firmansyah A, Dwipoerwantoro PG, Kadim M, Alatas S, Conus N, Lestarina L, Bouisset F, Steenhout P. | Discarded as dealing with synbiotics |
| 77 | Iran J Allergy Asthma Immunol. 2011 Mar; 10(1):21-8.  Synbiotics could not reduce the scoring of childhood atopic dermatitis (SCORAD): a randomized double blind placebo-controlled trial.  Shafiei A, Moin M, Pourpak Z, Gharagozlou M, Aghamohammadi A, Sajedi V, Soheili H, Sotoodeh S, Movahedi M. | Discarded as dealing with synbiotics |
| 78 | Pediatr Res. 2011 Mar; 69(3):255-8.  Effect of neutral and acidic oligosaccharides on fecal IL-8 and fecal calprotectin in preterm infants.  Westerbeek EA, Mørch E, Lafeber HN, Fetter WP, Twisk JW, Van Elburg RM. | Selected 36 |
| 79 | Asia Pac J Clin Nutr. 2010; 19(4):473-80.  Effect of a whey-predominant starter formula containing LCPUFAs and oligosaccharides (FOS/GOS) on gastrointestinal comfort in infants.  Vivatvakin B, Mahayosnond A, Theamboonlers A, Steenhout PG, Conus NJ. | Selected 37 |
| 80 | J Am Diet Assoc. 2010 Nov; 110(11):1728-33.  Tolerance of an enteral formula with insoluble and prebiotic fiber in children with compromised gastrointestinal function.  Khoshoo V, Sun SS, Storm H. | Selected 38 |
| 81 | Br J Nutr. 2011 Jan; 105(2):268-74.  The effect of enteral supplementation of a prebiotic mixture of non-human milk galacto-, fructo- and acidic oligosaccharides on intestinal permeability in preterm infants.  Westerbeek EA, van den Berg A, Lafeber HN, Fetter WP, van Elburg RM. | Selected 39 |
| 82 | J Allergy Clin Immunol. 2010 Oct; 126(4):791-7.  Reduced occurrence of early atopic dermatitis because of immunoactive prebiotics among low-atopy-risk infants.  Grüber C, Van Stuijvenberg M, Mosca F, Moro G, Chirico G, Braegger CP, Riedler J, Boehm G, Wahn U; | Selected 40 |
| 83 | J Pediatr. 2011 Feb; 158(2):288-92.e1.  Efficacy of a new hypotonic oral rehydration solution containing zinc and prebiotics in the treatment of childhood acute diarrhea: a randomized controlled trial.  [Passariello A](https://www.ncbi.nlm.nih.gov/pubmed/?term=Passariello%20A%5BAuthor%5D&cauthor=true&cauthor_uid=20828714), [Terrin G](https://www.ncbi.nlm.nih.gov/pubmed/?term=Terrin%20G%5BAuthor%5D&cauthor=true&cauthor_uid=20828714), [De Marco G](https://www.ncbi.nlm.nih.gov/pubmed/?term=De%20Marco%20G%5BAuthor%5D&cauthor=true&cauthor_uid=20828714), [Cecere G](https://www.ncbi.nlm.nih.gov/pubmed/?term=Cecere%20G%5BAuthor%5D&cauthor=true&cauthor_uid=20828714), [Ruotolo S](https://www.ncbi.nlm.nih.gov/pubmed/?term=Ruotolo%20S%5BAuthor%5D&cauthor=true&cauthor_uid=20828714), [Marino A](https://www.ncbi.nlm.nih.gov/pubmed/?term=Marino%20A%5BAuthor%5D&cauthor=true&cauthor_uid=20828714), [Cosenza L](https://www.ncbi.nlm.nih.gov/pubmed/?term=Cosenza%20L%5BAuthor%5D&cauthor=true&cauthor_uid=20828714), [Tardi M](https://www.ncbi.nlm.nih.gov/pubmed/?term=Tardi%20M%5BAuthor%5D&cauthor=true&cauthor_uid=20828714), [Nocerino R](https://www.ncbi.nlm.nih.gov/pubmed/?term=Nocerino%20R%5BAuthor%5D&cauthor=true&cauthor_uid=20828714), [Berni Canani R](https://www.ncbi.nlm.nih.gov/pubmed/?term=Berni%20Canani%20R%5BAuthor%5D&cauthor=true&cauthor_uid=20828714). | Discarded as dealing with prebiotics administered in oral rehydratation solution |
| 84 | PLoS One. 2010 Aug 13; 5(8):e12164.  Prebiotic and probiotic fortified milk in prevention of morbidities amongchildren: community-based, randomized, double-blind, controlled trial.  Sazawal S, Dhingra U, Hiremath G, Sarkar A, Dhingra P, Dutta A, Verma P, Menon VP, Black RE. | Discarded as out of age range |
| 85 | Pediatr Res. 2010 Nov; 68(5):440-5.  A randomized, double-blind, controlled trial of the effect of prebioticoligosaccharides on enteral tolerance in preterm infants.  Modi N, Uthaya S, Fell J, Kulinskaya E. | Selected 41 |
| 86 | J Pediatr Gastroenterol Nutr. 2010 Sep; 51(3):341-6.  Effects of Bifidobacterium lactis HN019 and prebiotic oligosaccharide added to milk on iron status, anemia, and growth among children 1 to 4 years old.  Sazawal S, Dhingra U, Hiremath G, Sarkar A, Dhingra P, Dutta A, Menon VP, Black RE. | Discarded as dealing with synbiotics |
| 87 | Nutrients. 2010 Jul; 2(7):683-92.  Short-term effect of prebiotics administration on stool characteristics and serum cytokines dynamics in very young children with acute diarrhea.  Vaisman N, Press J, Leibovitz E, Boehm G, Barak V. | Discarded as out of age range |
| 88 | Allergy. 2011 Feb; 66(2):170-7.  Synbiotics prevent asthma-like symptoms in infants with atopic dermatitis.  Van der Aa LB, Van Aalderen WM, Heymans HS, Henk Sillevis Smitt J, Nauta AJ, Knippels LM, Ben Amor K, Sprikkelman AB; Synbad Study Group. | Discarde as dealing with synbiotics |
| 89 | J Physiol Pharmacol. 2009 Dec; 60 Suppl 6:27-31.  Effects of probiotic and prebiotic on gastrointestinal motility in newborns.  Indrio F, Riezzo G, Raimondi F, Bisceglia M, Cavallo L, Francavilla R. | Selected 42 |
| 90 | Clin Exp Allergy. 2010 May; 40(5):795-804.  Effect of a new synbiotic mixture on atopic dermatitis in infants: a randomized-controlled trial.  [Van der Aa LB](https://www.ncbi.nlm.nih.gov/pubmed/?term=van%20der%20Aa%20LB%5BAuthor%5D&cauthor=true&cauthor_uid=20184604), [Heymans HS](https://www.ncbi.nlm.nih.gov/pubmed/?term=Heymans%20HS%5BAuthor%5D&cauthor=true&cauthor_uid=20184604), [Van Aalderen WM](https://www.ncbi.nlm.nih.gov/pubmed/?term=van%20Aalderen%20WM%5BAuthor%5D&cauthor=true&cauthor_uid=20184604), [Sillevis Smitt JH](https://www.ncbi.nlm.nih.gov/pubmed/?term=Sillevis%20Smitt%20JH%5BAuthor%5D&cauthor=true&cauthor_uid=20184604), [Knol J](https://www.ncbi.nlm.nih.gov/pubmed/?term=Knol%20J%5BAuthor%5D&cauthor=true&cauthor_uid=20184604), [Ben Amor K](https://www.ncbi.nlm.nih.gov/pubmed/?term=Ben%20Amor%20K%5BAuthor%5D&cauthor=true&cauthor_uid=20184604), [Goossens DA](https://www.ncbi.nlm.nih.gov/pubmed/?term=Goossens%20DA%5BAuthor%5D&cauthor=true&cauthor_uid=20184604), [Sprikkelman AB](https://www.ncbi.nlm.nih.gov/pubmed/?term=Sprikkelman%20AB%5BAuthor%5D&cauthor=true&cauthor_uid=20184604); [Synbad Study Group](https://www.ncbi.nlm.nih.gov/pubmed/?term=Synbad%20Study%20Group%5BCorporate%20Author%5D). | Discarded as out of age range |
| 91 | Am J Clin Nutr. 2010 Mar; 91(3):679-86.  Neutral and acidic oligosaccharides in preterm infants: a randomized,  double-blind, placebo-controlled trial.  Westerbeek EA, Van den Berg JP, Lafeber HN, Fetter WP, Boehm G, Twisk JW, Van Elburg RM. | Selected 43 |
| 92 | Pediatr Allergy Immunol. 2010 Mar; 21(2 Pt 2):e377-85.  Exploration of basal immune parameters in healthy infants receiving an infant milk formula supplemented with prebiotics.  Raes M, Scholtens PA, Alliet P, Hensen K, Jongen H, Boehm G, Vandenplas Y, Rummens JL. | Selected 44 |
| 93 | J Pediatr. 2010 Feb; 156(2):209-14.  The effects of lactulose supplementation to enteral feedings in premature infants: a pilot study.  Riskin A, Hochwald O, Bader D, Srugo I, Naftali G, Kugelman A, Cohen E, Mor F, Kaufman B, Shaoul R. | Discarded as dealing with lactulose |
| 94 | J Pediatr Gastroenterol Nutr. 2009 Nov; 49(5):626-30.  Pro- and prebiotic supplementation induces a transient reduction in hemoglobin concentration in infants.  Kuitunen M, Kukkonen K, Savilahti E. | Discarded as dealing with probiotics |
| 95 | Lancet. 2009 Jul 11; 374(9684):136-44.  Probiotics and prebiotics for severe acute malnutrition (PRONUT study): a double-blind efficacy randomised controlled trial in Malawi.  Kerac M, Bunn J, Seal A, Thindwa M, Tomkins A, Sadler K, Bahwere P, Collins S. | Discarded as dealing with pathological conditions |
| 96 | Pediatr Allergy Immunol. 2010 Feb; 21(1 Pt 1):67-73.  High intestinal IgA associates with reduced risk of IgE-associated allergic diseases.  Kukkonen K, Kuitunen M, Haahtela T, Korpela R, Poussa T, Savilahti E. | Discarded as dealing with probiotics |
| 97 | J Pediatr Gastroenterol Nutr. 2009 Aug; 49(2):258-61.  Prebiotics improve gastric motility and gastric electrical activity in preterm newborns.  Indrio F, Riezzo G, Raimondi F, Francavilla R, Montagna O, Valenzano ML, Cavallo L, Boehm G. | Selected 45 |
| 98 | Acta Paediatr. 2009 Oct; 98(10):1579-81.  The effect of prebiotics in the management of neonatal hyperbilirubinaemia.  Bisceglia M, Indrio F, Riezzo G, Poerio V, Corapi U, Raimondi F. | Selected 46 |
| 99 | Clin Exp Allergy. 2009 Sep; 39(9):1397-403.  Clinical effects of kestose, a prebiotic oligosaccharide, on the treatment of atopic dermatitis in infants.  Shibata R, Kimura M, Takahashi H, Mikami K, Aiba Y, Takeda H, Koga Y. | Selected 47 |
| 100 | Br J Nutr. 2009 Sep; 102(6):869-75.  Tolerance and safety of Lactobacillus paracasei ssp. paracasei in combination with Bifidobacterium animalis ssp. lactis in a prebiotic-containing infant formula: a randomised controlled trial.  Vlieger AM, Robroch A, van Buuren S, Kiers J, Rijkers G, Benninga MA, te Biesebeke R. | Discarded as dealing with synbiotics |
| 101 | Clin Nutr. 2009 Apr; 28(2):156-61.  A formula containing galacto- and fructo-oligosaccharides prevents intestinal and extra-intestinal infections: an observational study.  Bruzzese E, Volpicelli M, Squeglia V, Bruzzese D, Salvini F, Bisceglia M, Lionetti P, Cinquetti M, Iacono G, Amarri S, Guarino A. | Selected 48 |
| 102 | J Pediatr Gastroenterol Nutr. 2009 Feb; 48(2):216-25.  A randomized placebo-controlled comparison of 2 prebiotic/probiotic combinations in preterm infants: impact on weight gain, intestinal microbiota, and fecal short-chain fatty acids.  Underwood MA, Salzman NH, Bennett SH, Barman M, Mills DA, Marcobal A, Tancredi DJ, Bevins CL, Sherman MP. | Discarded as dealing with probiotics /synbiotics |
| 103 | J Allergy Clin Immunol. 2009 Feb; 123(2):335-41.  Probiotics prevent IgE-associated allergy until age 5 years in cesarean-delivered children but not in the total cohort.  Kuitunen M, Kukkonen K, Juntunen-Backman K, Korpela R, Poussa T, Tuure T, Haahtela T, Savilahti E. | Discarded as dealing with probiotics |
| 104 | Appl Environ Microbiol. 2009 Feb; 75(4):1121-8.  Molecular ecological analysis of fecal bacterial populations from term infants fed formula supplemented with selected blends of prebiotics.  Nakamura N, Gaskins HR, Collier CT, Nava GM, Rai D, Petschow B, Russell WM, Harris C, Mackie RI, Wampler JL, Walker DC. | Selected 49 |
| 105 | BMC Pediatr. 2008 Oct 23; 8:46.  Design of a randomised controlled trial on immune effects of acidic and neutral oligosaccharides in the nutrition of preterm infants: carrot study.  Westerbeek EA, Van Elburg RM, Van den Berg A, Van den Berg J, Twisk JW, Fetter WP, Lafeber HN. | Selected 50 |
| 106 | J Pediatr Gastroenterol Nutr. 2008 Jul; 47(1):45-53.  Long-term colonization of a Lactobacillus plantarum synbiotic preparation in the neonatal gut.  Panigrahi P, Parida S, Pradhan L, Mohapatra SS, Misra PR, Johnson JA, Chaudhry R, Taylor S, Hansen NI, Gewolb IH. | Discarded as dealing with synbiotic |
| 107 | Pediatrics. 2008 Jul; 122(1):8-12.  Long-term safety and impact on infection rates of postnatal probiotic andprebiotic (synbiotic) treatment: randomized, double-blind, placebo-controlled trial.  [Kukkonen K](https://www.ncbi.nlm.nih.gov/pubmed/?term=Kukkonen%20K%5BAuthor%5D&cauthor=true&cauthor_uid=18595980), [Savilahti E](https://www.ncbi.nlm.nih.gov/pubmed/?term=Savilahti%20E%5BAuthor%5D&cauthor=true&cauthor_uid=18595980), [Haahtela T](https://www.ncbi.nlm.nih.gov/pubmed/?term=Haahtela%20T%5BAuthor%5D&cauthor=true&cauthor_uid=18595980), [Juntunen-Backman K](https://www.ncbi.nlm.nih.gov/pubmed/?term=Juntunen-Backman%20K%5BAuthor%5D&cauthor=true&cauthor_uid=18595980), [Korpela R](https://www.ncbi.nlm.nih.gov/pubmed/?term=Korpela%20R%5BAuthor%5D&cauthor=true&cauthor_uid=18595980), [Poussa T](https://www.ncbi.nlm.nih.gov/pubmed/?term=Poussa%20T%5BAuthor%5D&cauthor=true&cauthor_uid=18595980), [Tuure T](https://www.ncbi.nlm.nih.gov/pubmed/?term=Tuure%20T%5BAuthor%5D&cauthor=true&cauthor_uid=18595980), [Kuitunen M](https://www.ncbi.nlm.nih.gov/pubmed/?term=Kuitunen%20M%5BAuthor%5D&cauthor=true&cauthor_uid=18595980). | Discarded as dealing with synbiotic |
| 108 | Allergy. 2009 Mar; 64(3):484-7.  A specific mixture of short-chain galacto-oligosaccharides and long-chain fructo-oligosaccharides induces a beneficial immunoglobulin profile in infants at high risk for allergy.  Van Hoffen E, Ruiter B, Faber J, M'Rabet L, Knol EF, Stahl B, Arslanoglu S, Moro G, Boehm G, Garssen J. | Selected 51 |
| 109 | J Pediatr Gastroenterol Nutr. 2008 May; 46(5):580-8.  Effects on faecal microbiota of dietary and acidic oligosaccharides in childrenduring partial formula feeding.  Magne F, Hachelaf W, Suau A, Boudraa G, Bouziane-Nedjadi K, Rigottier-Gois L, Touhami M, Desjeux JF, Pochart P. | Selected 52 |
| 110 | [J Nutr.](https://www.ncbi.nlm.nih.gov/pubmed/?term=Early+dietary+intervention+with+a+mixture+of+prebiotic+oligosaccharides+reduces+the+incidence+of+allergic+manifestations+and+infections+during+the+first+two+years+of+life.) 2008 Jun; 138(6):1091-5.  Early dietary intervention with a mixture of prebiotic oligosaccharides reduce the incidence of allergic manifestations and infections during the first two years of life  Arslanoglu S, Moro GE, Schmitt J, Tandoi L, Rizzardi S, Boehm G. | Discarded as out of age range |
| 111 | Am J Clin Nutr. 2008 May; 87(5):1365-73.  Assessment of the safety, tolerance, and protective effect against diarrhea ofinfant formulas containing mixtures of probiotics or probiotics and prebiotics in a randomized controlled trial.  Chouraqui JP, Grathwohl D, Labaune JM, Hascoet JM, de Montgolfier I, Leclaire M, Giarre M, Steenhout P. | Discarded as dealing with synbiotics |
| 112 | Am J Clin Nutr. 2007 Nov; 86(5):1426-37.  Effects of galactooligosaccharide and long-chain fructooligosaccharide supplementation during pregnancy on maternal and neonatal microbiota and immunity--a randomized, double-blind, placebo-controlled study.  Shadid R, Haarman M, Knol J, Theis W, Beermann C, Rjosk-Dendorfer D, Schendel DJ, Koletzko BV, Krauss-Etschmann S. | Discarded as out of scope of this review |
| 113 | J Nutr. 2007 Nov; 137(11):2420-4.  Early supplementation of prebiotic oligosaccharides protects formula-fed infants against infections during the first 6 months of life.  Arslanoglu S, Moro GE, Boehm G. | Selected 53 |
| 114 | Acta Paediatr. 2007 Nov; 96(11):1646-50.  The CUPDAY Study: prebiotic-probiotic milk product in 1-3-year-old children attending childcare centres.  Binns CW, Lee AH, Harding H, Gracey M, Barclay DV. | Discarded as out of age range |
| 115 | Asia Pac J Clin Nutr. 2007; 16(3):435-42.  The effect of early nutritional supplementation with a mixture of probiotic, prebiotic, fiber and micronutrients in infants with acute diarrhea in Indonesia.  Agustina R, Lukito W, Firmansyah A, Suhardjo HN, Murniati D, Bindels J | Discarded as enrolled subjects were in pathological conditions |
| 116 | Nutrition. 2007 Oct; 23(10):719-23.  Effect of prebiotic galacto-oligosaccharide, long-chain fructo-oligosaccharide infant formula on serum cholesterol and triacylglycerol levels.  Alliet P, Scholtens P, Raes M, Hensen K, Jongen H, Rummens JL, Boehm G, Vandenplas Y. | Selected 54 |
| 117 | Early Hum Dev. 2008 Jan; 84(1):45-9.  The effect of a prebiotic supplemented formula on growth and stool microbiology of term infants.  Costalos C, Kapiki A, Apostolou M, Papathoma E. | Selected 55 |
| 118 | J Pediatr Gastroenterol Nutr. 2007 Mar; 44(3):359-64.  Term infants fed formula supplemented with selected blends of prebiotics grow normally and have soft stools similar to those reported for breast-fed infants.  Ziegler E, Vanderhoof JA, Petschow B, Mitmesser SH, Stolz SI, Harris CL, Berseth CL. | Selected 56 |
| 119 | Asia Pac J Clin Nutr. 2007; 16(1):172-7.  Supplementation of baby formula with native inulin has a prebiotic effect in formula-fed babies.  Kim SH, Lee DH, Meyer D. | Selected 57 |
| 120 | J Allergy Clin Immunol. 2007 Jan; 119(1):192-8.  Probiotics and prebiotic galacto-oligosaccharides in the prevention of allergicdiseases: a randomized, double-blind, placebo-controlled trial.  Kukkonen K, Savilahti E, Haahtela T, Juntunen-Backman K, Korpela R, Poussa T, Tuure T, Kuitunen M. | Discarded as also mthers were treated |
| 121 | Nutrition. 2007 Jan; 23(1):1-8.  Clinical evaluation of a new starter formula for infants containing live Bifidobacterium longum BL999 and prebiotics.  Puccio G, Cajozzo C, Meli F, Rochat F, Grathwohl D, Steenhout P. | Discarded as dealing with synbiotics |
| 122 | J Pediatr Gastroenterol Nutr. 2006 Nov; 43(5):673-9.  Effects of bovine alpha-lactalbumin and casein glycomacropeptide-enriched infant formulae on faecal microbiota in healthy term infants.  Brück WM, Redgrave M, Tuohy KM, Lönnerdal B, Graverholt G, Hernell O, Gibson GR. | Discarded as out of scope of this review |
| 123 | Int J Food Microbiol. 2007 Jan 1; 113(1):108-13.  Effect of oligofructose supplementation on gut microflora and well-being in young children attending a day care centre.  Waligora-Dupriet AJ, Campeotto F, Nicolis I, Bonet A, Soulaines P, Dupont C, Butel MJ. | Discarded as out of age range |
| 124 | Early Hum Dev. 2007 May; 83(5):335-9.  The effect of a fructo-oligosaccharide supplemented formula on gut flora of preterm infants.  Kapiki A, Costalos C, Oikonomidou C, Triantafyllidou A, Loukatou E, Pertrohilou V. | Selected 58 |
| 125 | Arch Dis Child. 2006 Oct; 91(10):814-9.  A mixture of prebiotic oligosaccharides reduces the incidence of atopic dermatitis during the first six months of age.  Moro G, Arslanoglu S, Stahl B, Jelinek J, Wahn U, Boehm G. | Selected 59 |
| 126 | Asia Pac J Clin Nutr. 2006;15(3):368-76.  Effects of probiotic or prebiotic supplemented milk formulas on fecal microbiota composition of infants.  Brunser O, Figueroa G, Gotteland M, Haschke-Becher E, Magliola C, Rochat F, Cruchet S, Palframan R, Gibson G, Chauffard F, Haschke F. | Selected 60 |
| 127 | Acta Paediatr. 2006 Jul; 95(7):843-8.  Prebiotic oligosaccharides reduce stool viscosity and accelerate gastrointestinal transport in preterm infants.  Mihatsch WA, Hoegel J, Pohlandt F. | Selected 61 |
| 128 | Eur J Clin Nutr. 2006 Nov;60(11):1304-10.  Reduction of crying episodes owing to infantile colic: A randomized controlled study on the efficacy of a new infant formula.  Savino F, Palumeri E, Castagno E, Cresi F, Dalmasso P, Cavallo F, Oggero R. | Discarded as fourmula used han an high beta-palmitic acid content |
| 129 | J Pediatr Gastroenterol Nutr. 2006 May; 42(5):553-9.  Bifidogenic effects of solid weaning foods with added prebiotic oligosaccharides: a randomised controlled clinical trial.  Scholtens PA, Alles MS, Bindels JG, van der Linde EG, Tolboom JJ, Knol J. | Discarded as out of age range |
| 130 | Pediatr Res. 2006 Mar; 59(3):451-6.  Effect of a milk formula with prebiotics on the intestinal microbiota of infants after an antibiotic treatment.  Brunser O, Gotteland M, Cruchet S, Figueroa G, Garrido D, Steenhout. | Selected 62 |
| 131 | Appl Environ Microbiol. 2006 Apr;72(4):2359-65.  Quantitative real-time PCR analysis of fecal Lactobacillus species in infants receiving a prebiotic infant formula.  Haarman M(1), Knol J. | Selected 63 |
| 132 | Orv Hetil. 2005 Nov 27; 146(48):2445-50.  Randomised placebo controlled double blind study on the effect of prebiotic  oligosaccharides on intestinal flora in healthy infants.  [Article in Hungarian]  Decsi T, Arató A, Balogh M, Dolinay T, Kanjo AH, Szabó E, Várkonyi A.  Pécsi Tudományegyetem, Gyermekgyógyászati Klinika, Pécs. | Discarded as not in English (Hungarian) |
| 133 | Br J Nutr. 2005 Nov; 94(5):783-90.  Effects of infant formula containing a mixture of galacto- and fructo-oligosaccharides or viable Bifidobacterium animalis on the intestinal microflora during the first 4 months of life.  Bakker-Zierikzee AM, Alles MS, Knol J, Kok FJ, Tolboom JJ, Bindels JG. | Selected 64 |
| 134 | J Pediatr Gastroenterol Nutr. 2005 Aug; 41(2):186-90.  Acidic oligosaccharides from pectin hydrolysate as new component for infantformulae: effect on intestinal flora, stool characteristics, and pH.  Fanaro S, Jelinek J, Stahl B, Boehm G, Kock R, Vigi V. | Selected 65 |
| 135 | Appl Environ Microbiol. 2005 May; 71(5):2318-24.  Quantitative real-time PCR assays to identify and quantify fecal Bifidobacterium species in infants receiving a prebiotic infant formula.  Haarman M, Knol J. | Selected 66 |
| 136 | J Pediatr Gastroenterol Nutr. 2005 Feb; 40(2):157-64.  Prebiotic effect of fructo-oligosaccharide supplemented term infant formula at two concentrations compared with unsupplemented formula and human milk.  Euler AR, Mitchell DK, Kline R, Pickering LK. | Selected 67 |
| 137 | Curr Pharm Des. 2005; 11(1):55-74.  The delivery of probiotics and prebiotics to infants.  Kullen MJ, Bettler J. | Discarded as not a clinical trial |
| 138 | Pediatrics. 2005 Jan; 115(1):5-9.  Effect of a probiotic infant formula on infections in child care centers: comparison of two probiotic agents.  Weizman Z, Asli G, Alsheikh A. | Discarded as dealing with probiotics |
| 139 | J Pediatr Gastroenterol Nutr. 2005 Jan; 40(1):36-42.  Colon microflora in infants fed formula with galacto- and fructo-oligosaccharides: more like breast-fed infants.  Knol J, Scholtens P, Kafka C, Steenbakkers J, Gro S, Helm K, Klarczyk M,Schöpfer H, Böckler HM, Wells J. | Selected 68 |
| 140 | Acta Paediatr Suppl. 2003 Sep; 91(441):77-9.  Effects of a new mixture of prebiotics on faecal flora and stools in term infants.  Moro GE, Mosca F, Miniello V, Fanaro S, Jelinek J, Stahl B, Boehm G. | Selected 69 |
| 141 | Acta Paediatr Suppl. 2003 Sep; 91(441):64-7.  Prebiotic concept for infant nutrition.  Boehm G, Fanaro S, Jelinek J, Stahl B, Marini A. | Discarded as not a clinical trial |
| 142 | Am J Clin Nutr. 2003 Apr; 77(4):937-42.  Oligofructose-supplemented infant cereal: 2 randomized, blinded, community-based trials in Peruvian infants.  Duggan C, Penny ME, Hibberd P, Gil A, Huapaya A, Cooper A, Coletta F, Emenhiser C, Kleinman RE. | Discarded as out of age range |
| 143 | J Pediatr Gastroenterol Nutr. 2003 Mar; 36(3):343-51.  Randomized double-blind study of the nutritional efficacy and bifidogenicity of a new infant formula containing partially hydrolyzed protein, a high beta-palmitic acid level, and nondigestible oligosaccharides.  Schmelzle H, Wirth S, Skopnik H, Radke M, Knol J, Böckler HM, Brönstrup A, Wells J, Fusch C. | Discarded as containing additional ingredients |
| 144 | Arch Dis Child Fetal Neonatal Ed. 2002 May; 86(3):F178-81.  Supplementation of a bovine milk formula with an oligosaccharide mixture increases counts of faecal bifidobacteria in preterm infants.  Boehm G, Lidestri M, Casetta P, Jelinek J, Negretti F, Stahl B, Marini A. | Selected 70 |
| 145 | J Pediatr Gastroenterol Nutr. 2002 Mar; 34(3):291-5.  Dosage-related bifidogenic effects of galacto- and fructooligosaccharides in formula-fed term infants.  Moro G, Minoli I, Mosca M, Fanaro S, Jelinek J, Stahl B, Boehm G. | Selected 71 |
